# Supplementary material
Source: PubMed Central journal article supplement (PMC6813590)
Supplement: jamafacialplastsurg-21-491-s001.pdf [file jamafacialplastsurg-21-491-s001.pdf]

## Supplementary Online Content

Olds C, Spataro E, Li K, Kandathil C, Most SP. Postoperative antibiotic use among patients undergoing functional facial plastic and reconstructive surgery.

*JAMA Facial Plast Surg*. Published online October 24, 2019.

doi:10.1001/jamafacial.2019.1027

**eFigure 1.** Temporal Trends in Postoperative Antibiotic Prescriptions

**eFigure 2.** Duration of Postoperative Antibiotic Courses After Nasal and Oculoplastic Surgery

**eTable 1.** Procedure Classes by *Current Procedural Terminology (CPT)* Code

**eTable 2.** 30-Day Postoperative Complications by *ICD-9/CPT* Code

**eTable 3.** Past-Year Comorbidities by *ICD-9/HCPCS* Code

**eTable 4.** Number of Patients Undergoing Primary and Secondary Rhinoplasty with Cartilage Grafting

**eTable 5.** Patients With Prior-Year Diagnoses of Immunocompromise are Less Likely to Receive Postoperative Antibiotics Than Immunocompetent Patients

**eTable 6.** Readmission Rates and Causes Among Patients Undergoing Facial Plastic Surgery

This supplementary material has been provided by the authors to give readers additional information about their work.

**eFigure 1.** Temporal Trends in Postoperative Antibiotic Prescriptions

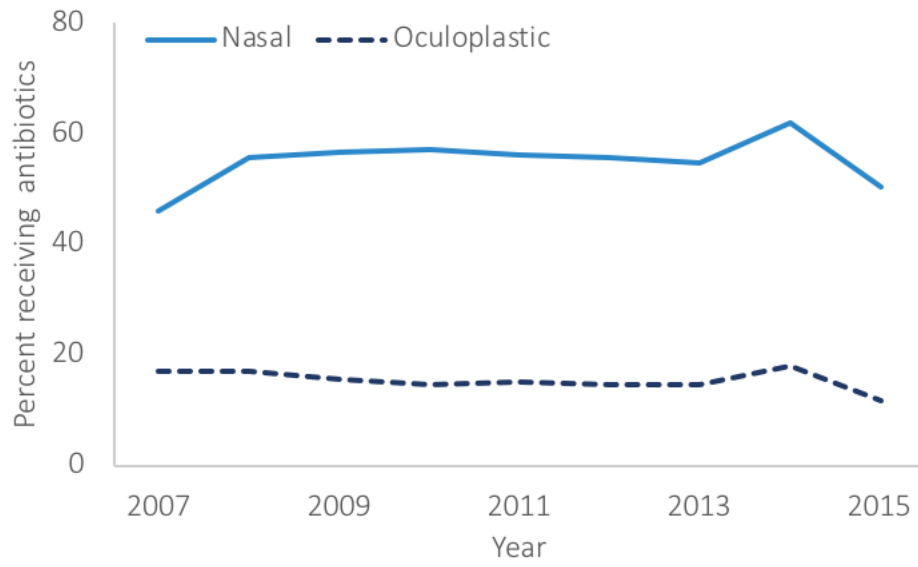

**eFigure 2.** Duration of Postoperative Antibiotic Courses After Nasal and Oculoplastic Surgery

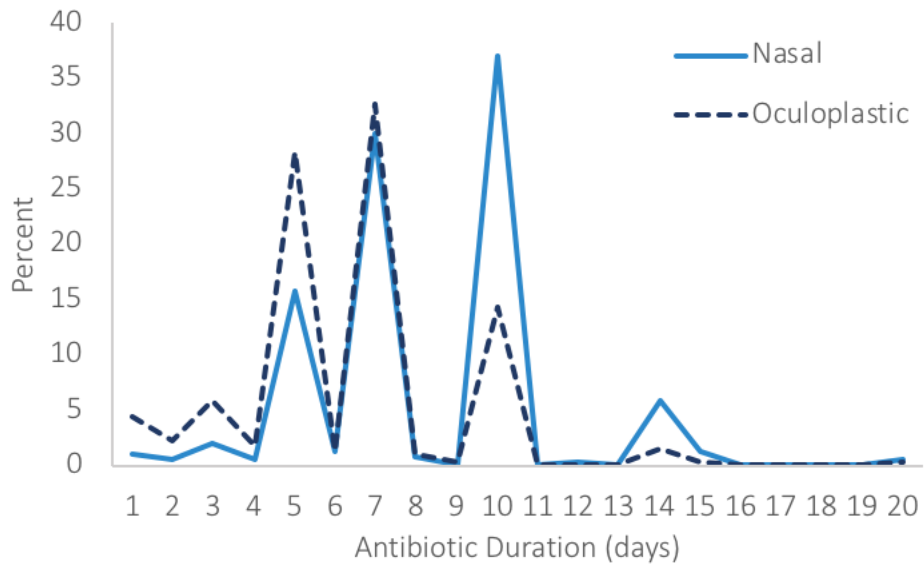

**eTable 1.** Procedure Classes by *Current Procedural Terminology (CPT) Code*

| <b>Procedure Class</b>                                                                        | <b>CPT Code</b>                                                                                         |
|-----------------------------------------------------------------------------------------------|---------------------------------------------------------------------------------------------------------|
| Nasal (rhinoplasty, septoplasty, turbinate reduction)                                         | 30400, 30410, 30420, 30430, 30435, 30450, 30460, 30462, 30420, 30465, 30520, 15732, 21.83, 21.86, 21.88 |
| Oculoplastic (upper blepharoplasty, lower blepharoplasty, ectropion repair, entropion repair) | 15820, 15821, 15822, 15823                                                                              |

**eTable 2.** 30-Day Postoperative Complications by *ICD-9/CPT* Code

| <b>30-day Complication Class</b>                                                    | <b><i>ICD-9/CPT</i> Code</b>                                                                                  |
|-------------------------------------------------------------------------------------|---------------------------------------------------------------------------------------------------------------|
| Bleeding                                                                            | <i>ICD-9</i> : 998.11, 998.12, 998.13, 78.47                                                                  |
| Noninfectious wound healing complications (dehiscence, fistula formation, necrosis) | <i>ICD-9</i> : 998.30, 998.31, 998.32, 998.6, 998.83                                                          |
| Superficial SSI                                                                     | <i>ICD-9</i> : 998.51, 998.59, 478.19                                                                         |
| Deep SSI                                                                            | <i>CPT</i> : 100.60, 100.61, 101.60, 101.80, 86.04                                                            |
| Hospital Readmission                                                                | <i>ICD-9</i> : 992.34, 992.35, 992.36, 992.18, 992.19, 992.20, 992.21, 992.22, 992.23, 992.17, 992.38, 992.39 |

**eTable 3.** Past-Year Comorbidities by *ICD-9/HCPCS* Code

| <b>Comorbidity</b> | <b><i>ICD-9/HCPCS</i> Code</b>                                                                                                                                                                                                                                                                                                                                                                                                                                                                                                                                                                                                                                                                                                                                                                                                                                                                                                                                                                                                                                                                                                                                       |
|--------------------|----------------------------------------------------------------------------------------------------------------------------------------------------------------------------------------------------------------------------------------------------------------------------------------------------------------------------------------------------------------------------------------------------------------------------------------------------------------------------------------------------------------------------------------------------------------------------------------------------------------------------------------------------------------------------------------------------------------------------------------------------------------------------------------------------------------------------------------------------------------------------------------------------------------------------------------------------------------------------------------------------------------------------------------------------------------------------------------------------------------------------------------------------------------------|
| Tobacco use        | 305.1, 994.06, 994.07, V1582, G0436                                                                                                                                                                                                                                                                                                                                                                                                                                                                                                                                                                                                                                                                                                                                                                                                                                                                                                                                                                                                                                                                                                                                  |
| Diabetes           | V58.67, 250.0, 250.00, 250.02, 250.1, 250.10, 250.11, 250.12, 250.13, 250.4, 250.40, 250.41, 250.42, 250.43, 250.5, 250.50, 250.51, 250.52, 250.53, 250.6, 250.60, 250.61, 250.62, 250.63, 250.7, 250.70, 250.71, 250.72, 250.73, 250.9, 250.90, 250.91, 250.92, 250.93, 583.81, 362.0                                                                                                                                                                                                                                                                                                                                                                                                                                                                                                                                                                                                                                                                                                                                                                                                                                                                               |
| Immunocompromise   | V58.65, 042, 279.0, 279.1, 279.2, 279.3, 279.4, 279.5, 279.8, 279.9, 279.00, 279.01, 279.02, 279.03, 279.04, 279.05, 279.06, 279.09, 279.10, 279.11, 279.12, 279.13, 279.19, 279.41, 279.49, 279.50, 279.51, 279.52, 279.53, 203.0, 203.1, 203.8, 203.00, 203.01, 203.02, 203.10, 203.11, 203.12, 203.80, 203.81, 203.82, 204.0, 204.1, 204.2, 204.8, 204.9, 204.00, 204.01, 204.02, 204.10, 204.11, 204.12, 204.20, 204.21, 204.22, 204.80, 204.81, 204.82, 204.90, 204.91, 204.92, 205.0, 205.1, 205.2, 205.3, 205.8, 205.9, 205.00, 205.01, 205.02, 205.10, 205.11, 205.12, 205.20, 205.21, 205.22, 205.30, 205.31, 205.32, 205.80, 205.81, 205.82, 205.90, 205.91, 205.92, 206.0, 206.1, 206.2, 206.8, 206.9, 206.00, 206.01, 206.02, 206.10, 206.11, 206.12, 206.20, 206.21, 206.80, 206.81, 206.82, 206.90, 206.91, 206.92, 207.0, 207.2, 207.8, 207.00, 207.01, 207.10, 207.11, 207.12, 207.20, 207.21, 207.22, 207.80, 207.81, 207.82, 282.60, 282.61, 288.0, 288.1, 288.2, 288.3, 288.4, 288.5, 288.6, 288.8, 288.9, 288.00, 288.01, 288.02, 288.03, 288.04, 288.09, 288.50, 288.51, 288.59, 288.60, 288.61, 288.62, 288.63, 288.64, 288.65, 288.66, 288.69 |
| Autoimmune disease | 135, 245.2, 279.49, 283.0, 446.4, 571.6, 579.0, 696.0, 710.0, 710.1, 710.2, 710.3, 710.9, 711.90, 712.19, 714.0, 714.30, 720.0, 725, 729.1, 795.79, G8859, G8860                                                                                                                                                                                                                                                                                                                                                                                                                                                                                                                                                                                                                                                                                                                                                                                                                                                                                                                                                                                                     |

**eTable 4.** Number of Patients Undergoing Primary and Secondary Rhinoplasty with Cartilage Grafting

| <b>Procedure</b>                              | <b>N (%<sup>a</sup>)</b>                    |
|-----------------------------------------------|---------------------------------------------|
| Primary rhinoplasty with cartilage grafting   | 7572 (3.4%)                                 |
| Secondary rhinoplasty                         | 466 (# of these receiving cartilage) (0.2%) |
| Secondary rhinoplasty with cartilage grafting | 6345 (2.9%)                                 |

<sup>a</sup>Denominator for percentage is the total number of patients who underwent nasal procedures

**eTable 5.** Patients With Prior-Year Diagnoses of Immunocompromise are Less Likely to Receive Postoperative Antibiotics Than Immunocompetent Patients

|                                          | <b>All</b>           | <b>Nasal</b>         | <b>Oculoplastic</b> |
|------------------------------------------|----------------------|----------------------|---------------------|
| Number in cohort (% of total)            | 294,039 (100)        | 220,433 (74.9)       | 73,606 (25.1)       |
| Postoperative antibiotics prescribed     |                      |                      |                     |
| (-) immunocompromise (n,% <sup>a</sup> ) | 119,194 (45.4)       | 110,387 (55.1)       | 8,807 (14.1)        |
| (+) immunocompromise (n,% <sup>b</sup> ) | 10,112 (32.3)        | 8,545 (42.6)         | 1,567 (13.8)        |
| OR (95% CI), p                           | 0.574 (0.560-0.588)* | 0.606 (0.589-0.624)* | 0.978 (0.923-1.037) |

<sup>a</sup>Denominator for percentage is the number of patients in each procedure class without a prior-year diagnosis of immunocompromise

<sup>b</sup>Denominator for percentage is the number of patients in each procedure class with a prior-year diagnosis of immunocompromise

\* =  $P < 0.05$



**eTable 6.** Readmission Rates and Causes Among Patients Undergoing Facial Plastic Surgery

| Reason for readmission | Nasal procedures, n (% <sup>a</sup> ) | Oculoplastic procedures, n (% <sup>a</sup> ) |
|------------------------|---------------------------------------|----------------------------------------------|
| Postoperative SSI      |                                       |                                              |
| Superficial            | 835 (14.2)                            | 543 (33.8)                                   |
| Deep                   | 703 (11.9)                            | 216 (13.4)                                   |
| Pain                   | 987 (16.8)                            | 108 (6.7)                                    |
| Dehydration            | 689 (11.7)                            | 97 (6.0)                                     |
| Bleeding               | 710 (12.1)                            | 172 (10.7)                                   |
| Other                  | 1942 (33.1)                           | 470 (29.2)                                   |

<sup>a</sup>Denominator for percentages is number of patients from a given procedure class who were readmitted postoperatively
